# Supplementary material
Source: PubMed Central journal article supplement (PMC2517581)
Supplement: NIHMS61008-supplement-si20060328_061.pdf [file NIHMS61008-supplement-si20060328_061.pdf]

# A photodimerizable ditopic ligand

Damien Jouvenot, Edith C. Glazer and Yitzhak Tor\*

*Department of Chemistry and Biochemistry, University of California,  
San Diego, La Jolla, California 92093*

[ytor@ucsd.edu](mailto:ytor@ucsd.edu)

|                                                                                                                     | <u>Page</u> |
|---------------------------------------------------------------------------------------------------------------------|-------------|
| General procedures                                                                                                  | S2          |
| Synthetic Procedures and Analytical Data                                                                            | S3          |
| <b>Fig. S.1–Fig. S.10</b>                                                                                           |             |
| Quantum Yield Determination                                                                                         | S19         |
| <b>Fig. S.11.</b> Absorption spectrum of ligand <b>2</b> in dichloromethane                                         | S20         |
| <b>Fig. S.12.</b> Fluorescence monitoring of the reversible dimerization                                            | S21         |
| <b>Fig S.13.</b> Mass Spectrum of compound <b>2</b>                                                                 | S22         |
| Crystal data and structure refinement for <b>1</b>                                                                  | S23         |
| Crystal data and structure refinement for <b>2</b>                                                                  | S24         |
| <b>Fig. S.14.</b> UV-Vis spectra of mono and dinuclear Ru(II) complexes<br>of Ligand <b>1</b> in CH <sub>3</sub> CN | S25         |
| <b>Fig. S.15.</b> Reactions of ligands <b>1</b> and <b>2</b> with Fe <sup>2+</sup> show distinct colors             | S26         |

## General Procedures

NMR spectra were recorded on a Varian Mercury 400 MHz spectrometer. Mass spectra were recorded at the UCSD Chemistry and Biochemistry Mass Spectrometry Facility, utilizing either a LCQDECA (Finnigan) ESI with a quadrupole ion trap or a MAT900XL (ThermoFinnigan) FAB double focusing mass spectrometer. UV-Vis spectra were recorded on either a Hewlett Packard 8452A. Fluorescence spectra were recorded on a Perkin-Elmer LS50B Luminescence Spectrometer. Unless otherwise specified, materials obtained from commercial suppliers were used without further purification. Anhydrous pyridine and acetonitrile were obtained from Fluka. Anhydrous dioxane and triethylamine were obtained from Acros. Anhydrous dichloromethane and tetrahydrofuran were obtained using a two-column purification system (Glasscontour System, Irvine, CA). NMR solvents were purchased from Cambridge Isotope Laboratories (Andover, MA).

**Synthetic Procedures and Analytical Data ( $^1\text{H-NMR}$ ,  $^{13}\text{C-NMR}$ , MS, UV-Vis).**

**Compound 4 : dimethyl 4,6-bis(trifluoromethylsulfonyloxy)isophthalate.**

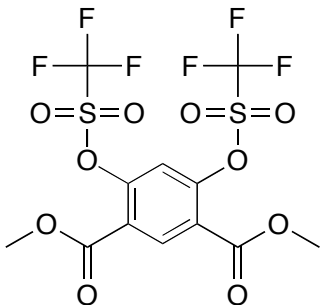

To a solution of dimethyl 4,6-dihydroxyisophthalate (1.00 g, 4.4 mmol) in 75 ml of a mixture of  $\text{CH}_2\text{Cl}_2$ /pyridine (70/30) at  $0\text{ }^\circ\text{C}$ , was slowly added 1.8 ml (10.6 mmol) of triflic anhydride. The reaction mixture was allowed to reach room temperature and was stirred for 40 minutes. It was then washed with 250 ml of 5 % HCl. The organic phase was dried over  $\text{Na}_2\text{SO}_4$  and the solvent evaporated, affording 1.715 g of compound **4** (3.5 mmol; 79% yield).  $^1\text{H NMR}$  (400 MHz,  $\text{CDCl}_3$ ):  $\delta = 8.82$  (s, 1H), 7.26 (s, 1H), 4.01 (s, 6H);  $^{13}\text{C NMR}$  (100 MHz,  $\text{CDCl}_3$ ):  $\delta = 162.3, 150.8, 137.3, 124.9, 120.4, 118.6, 53.6$

Fig S.1.  $^1\text{H}$  NMR Spectrum of Compound 4

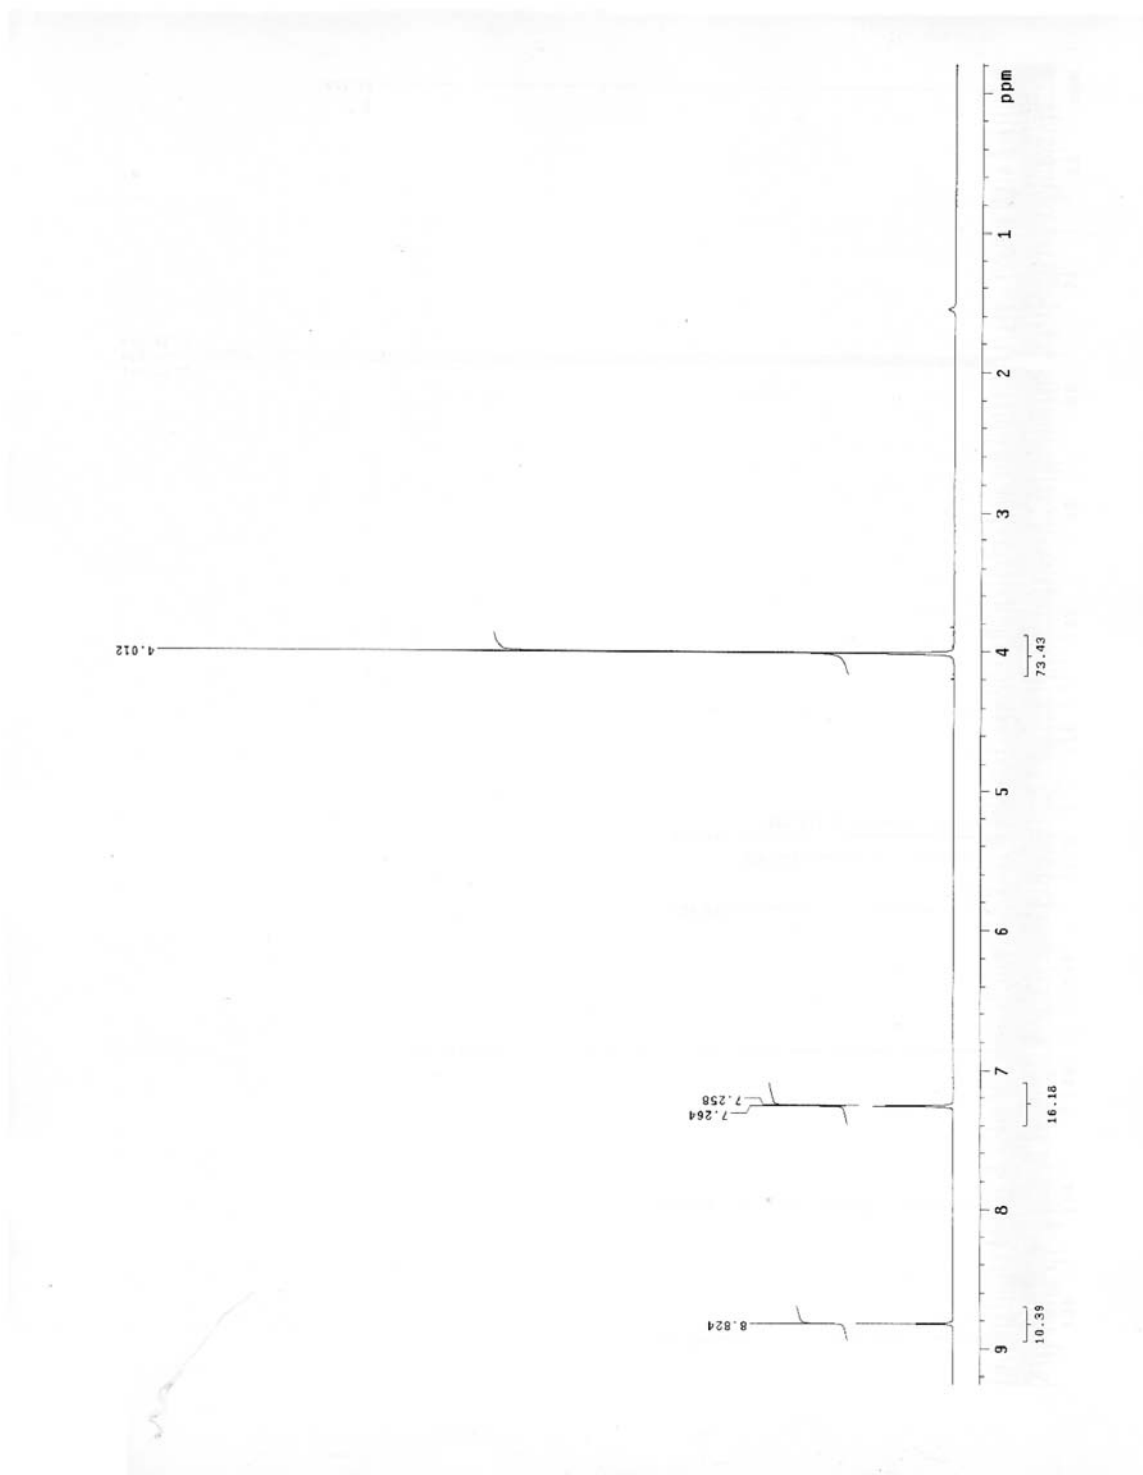

Fig S.2.  $^{13}\text{C}$  NMR Spectrum of compound 4

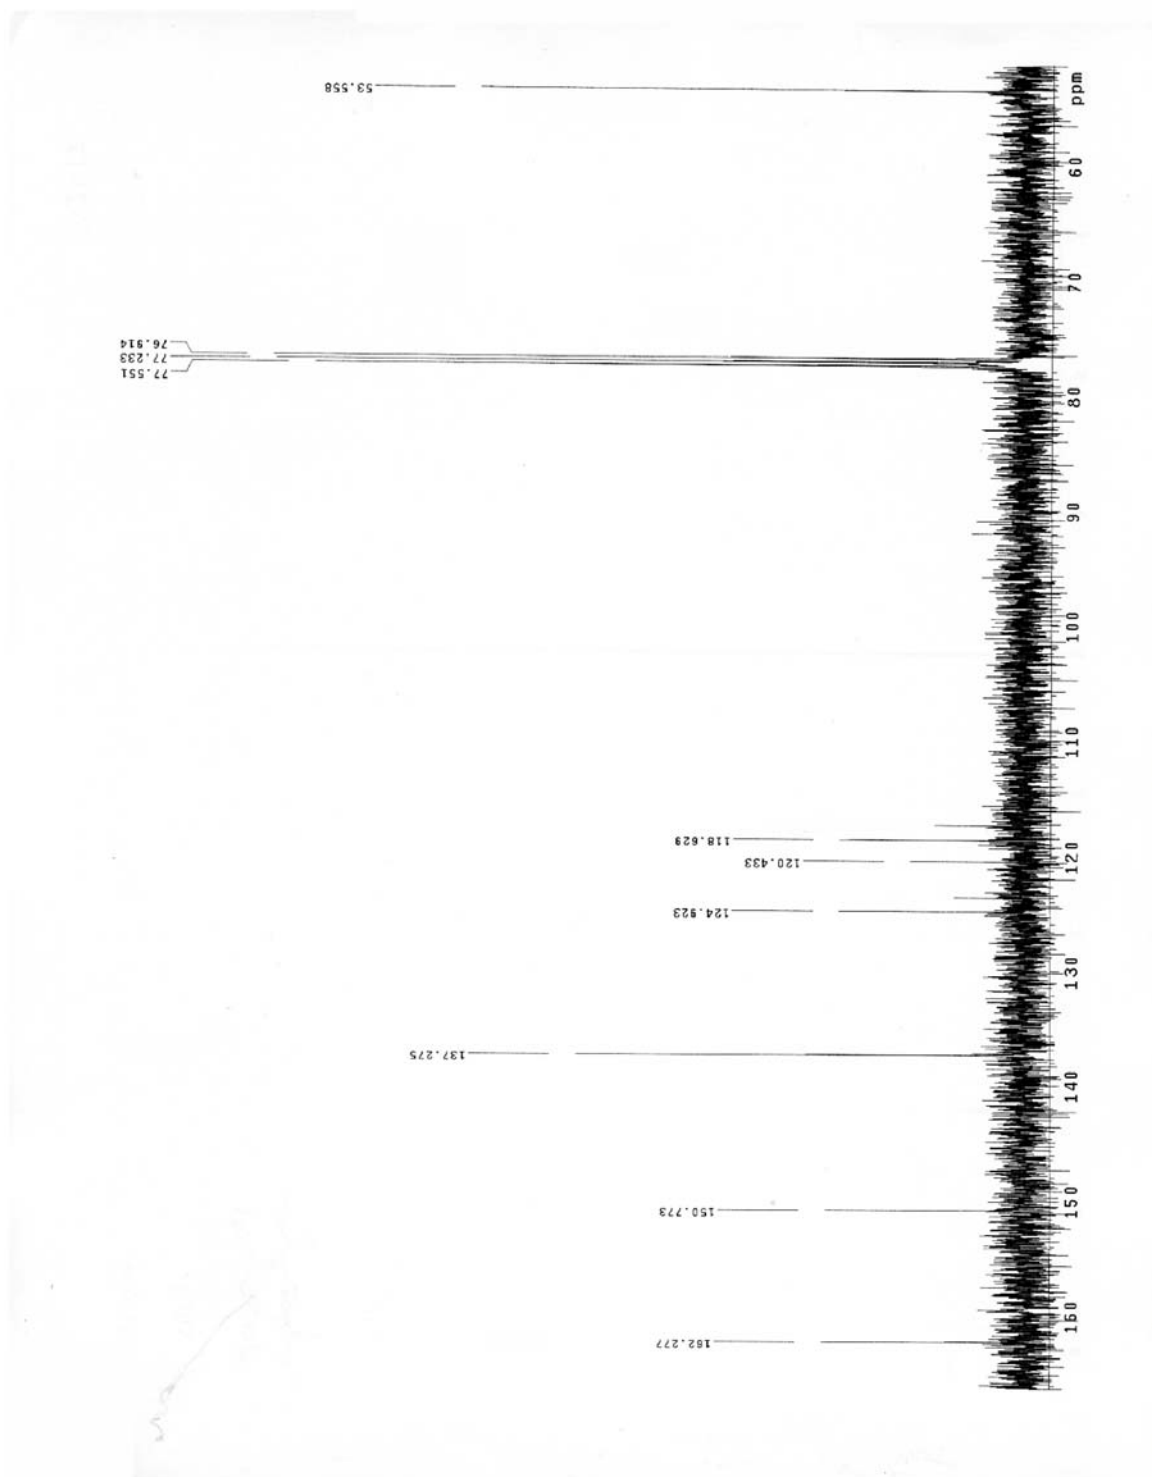

**Compound 5 : dimethyl 4,6-bis(2-(trimethylsilyl)ethynyl)isophthalate.**

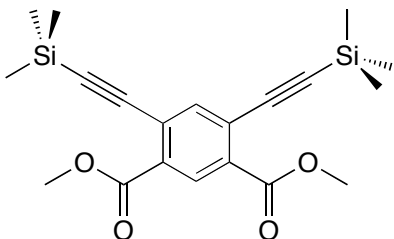

A degassed solution of **4** (915 mg, 1.86 mmol) in a 1/1 mixture of dry THF and dry triethylamine (7.5 ml) was cannulated into a pressure tube containing Pd(dppf)Cl<sub>2</sub> (152 mg, 0.186 mmol) and CuI (36 mg, 0.186 mmol). To this solution was cannulated a solution of trimethylsilyl acetylene (2.65 ml, 18.6 mmol) in a 1/1 mixture of dry THF and dry triethylamine (7.5 ml). The pressure tube was sealed and stirred at 45 °C overnight. The reaction was then cooled down to room temperature and the solvents are evaporated. The crude product was taken up in a CH<sub>2</sub>Cl<sub>2</sub>/H<sub>2</sub>O mixture, and the organic phase washed 3 times with water. The organic phase was dried over Na<sub>2</sub>SO<sub>4</sub> and the solvent evaporated. Column chromatography on SiO<sub>2</sub> (AcOEt/Hexanes 20%) afforded 0.635 mg (1.64 mmol; 88% yield) of **5** as a white powder. <sup>1</sup>H NMR (400 MHz, CDCl<sub>3</sub>): δ = 8.48 (s, 1H), 7.78 (s, 1H), 3.92 (s, 6H), 0.27 (s, 18H); <sup>13</sup>C NMR (100 MHz, CDCl<sub>3</sub>): δ = 165.6, 140.7, 132.9, 131.5, 126.8, 104.1, 101.9, 52.5, -0.1; MS *m/z*. calculated for C<sub>20</sub>H<sub>27</sub>O<sub>4</sub>Si<sub>2</sub> [M+H]<sup>+</sup> 387.14, found 387.03.

Fig S.3.  $^1\text{H}$  NMR Spectrum of Compound 5

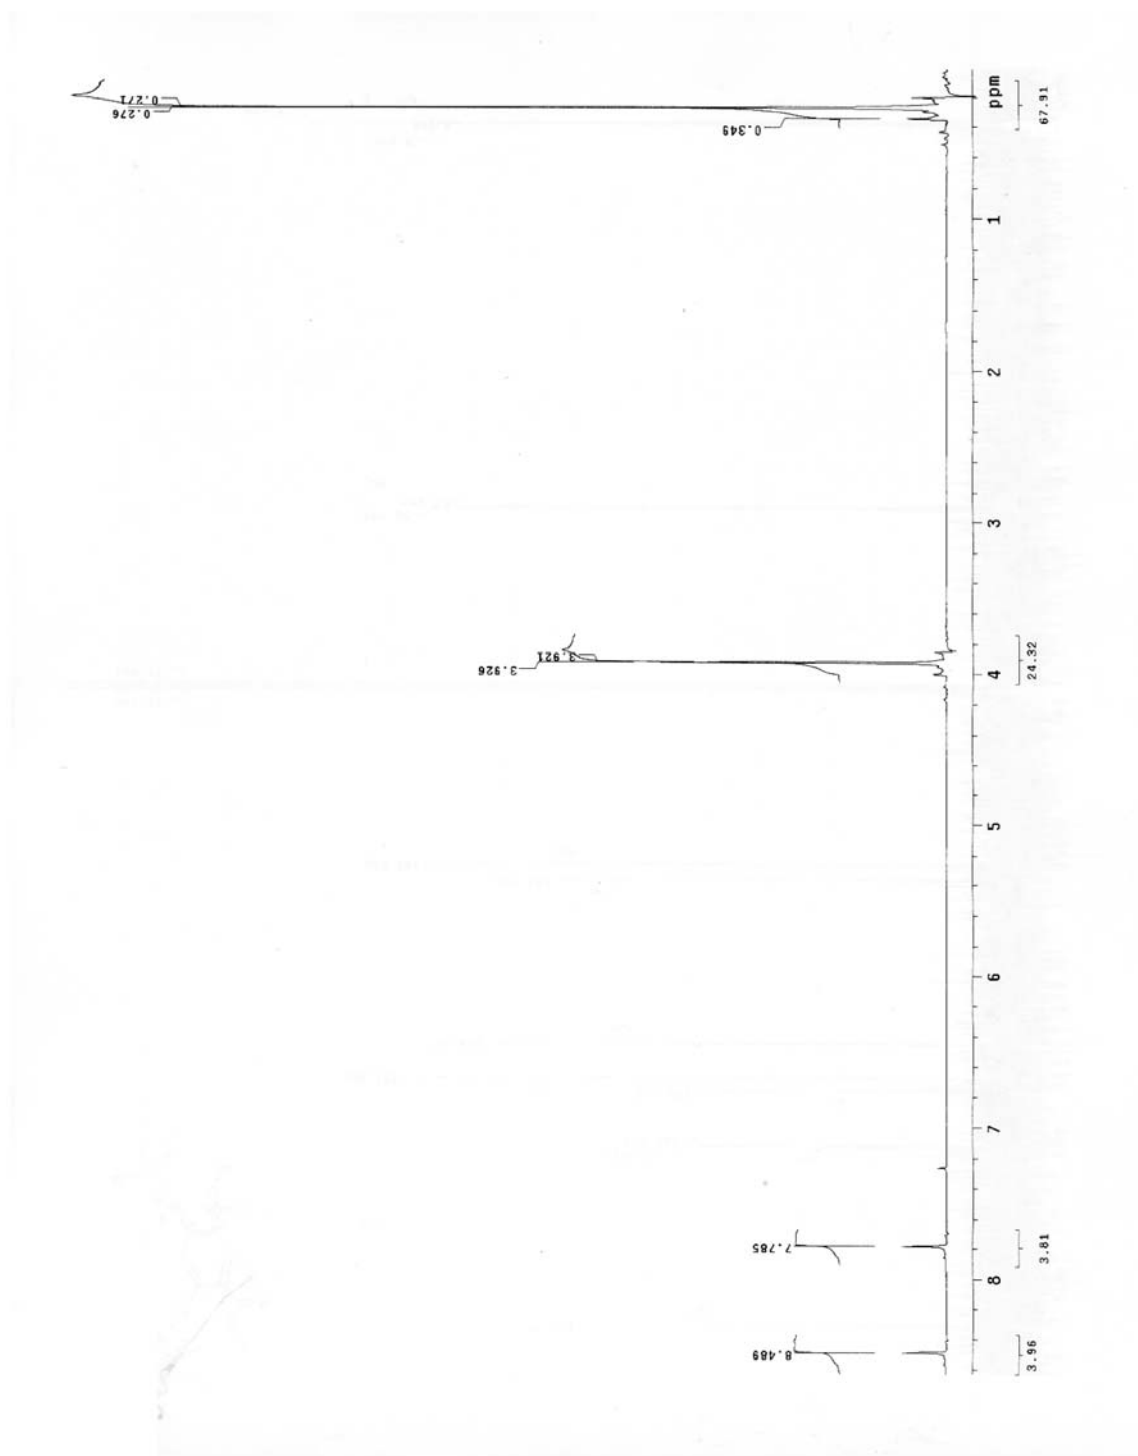

Fig S.4.  $^{13}\text{C}$  NMR Spectrum of Compound 5

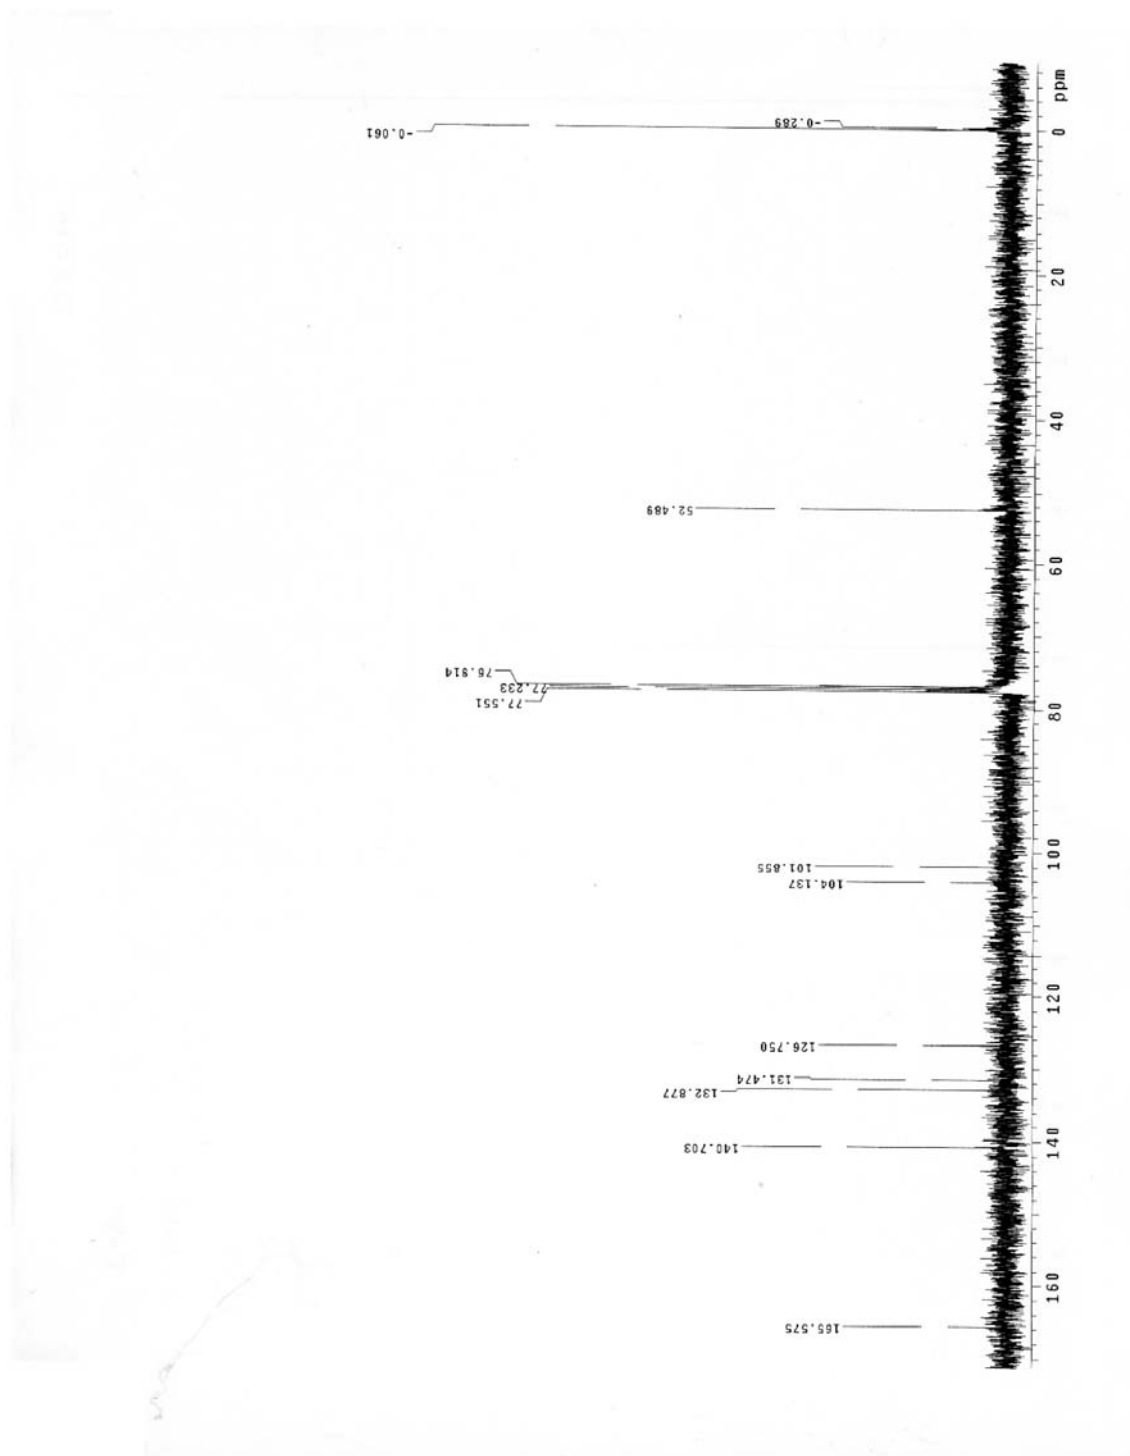



**Compound 6 : 1,8-dihydroxy-2,7-diazaanthracene.**

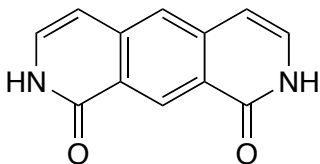

Ammonia was bubbled through a suspension of **5** (4.475 g, 11.6 mmol) in absolute ethanol (30 ml) at 0 °C in a pressure tube. Once saturated, the pressure tube was sealed and the reaction mixture stirred at 140 °C overnight. The reaction mixture was then cooled down to 0 °C and the pressure tube carefully opened. The remaining ammonia was removed by bubbling air through the suspension. The reaction mixture was filtered and the precipitate washed with cold methanol. The solid was then dried under vacuum affording 1.375 g of product **6** ( 6.5 mmol, 56% yield) as a yellow powder. <sup>1</sup>H NMR (400 MHz, DMSO-*d*<sub>6</sub>): δ = 9.01 (s, 1H), 7.79 (s, 1H), 7.22 (d, *J* = 7.2 Hz, 2H), 6.55 (d, *J* = 7.2 Hz, 2H); <sup>13</sup>C NMR (100 MHz, DMSO-*d*<sub>6</sub>): δ = 162.5, 140.7, 131.6, 128.0, 125.0, 122.0, 104.7; ESI-MS *m/z* calculated for C<sub>12</sub>H<sub>9</sub>N<sub>2</sub>O<sub>2</sub> [M+H]<sup>+</sup> 213.22, found 213.07.

**Fig S.5.  $^1\text{H}$  NMR Spectrum of Compound 6**

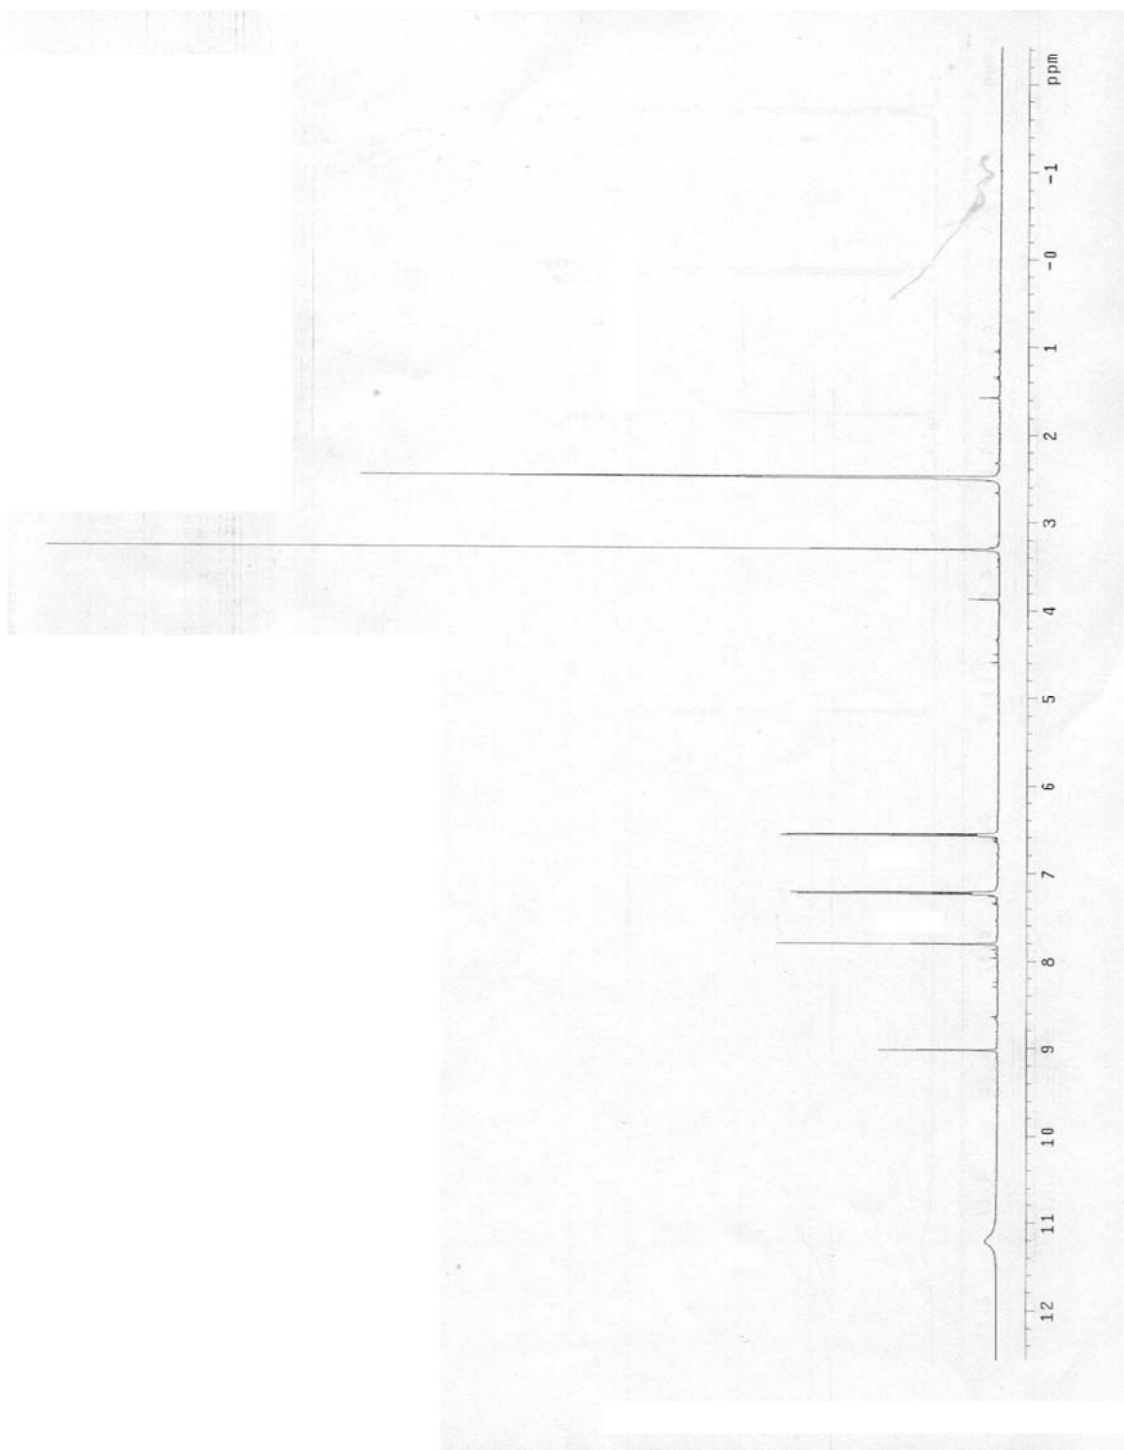

Fig S.6.  $^{13}\text{C}$  NMR Spectrum of Compound 6

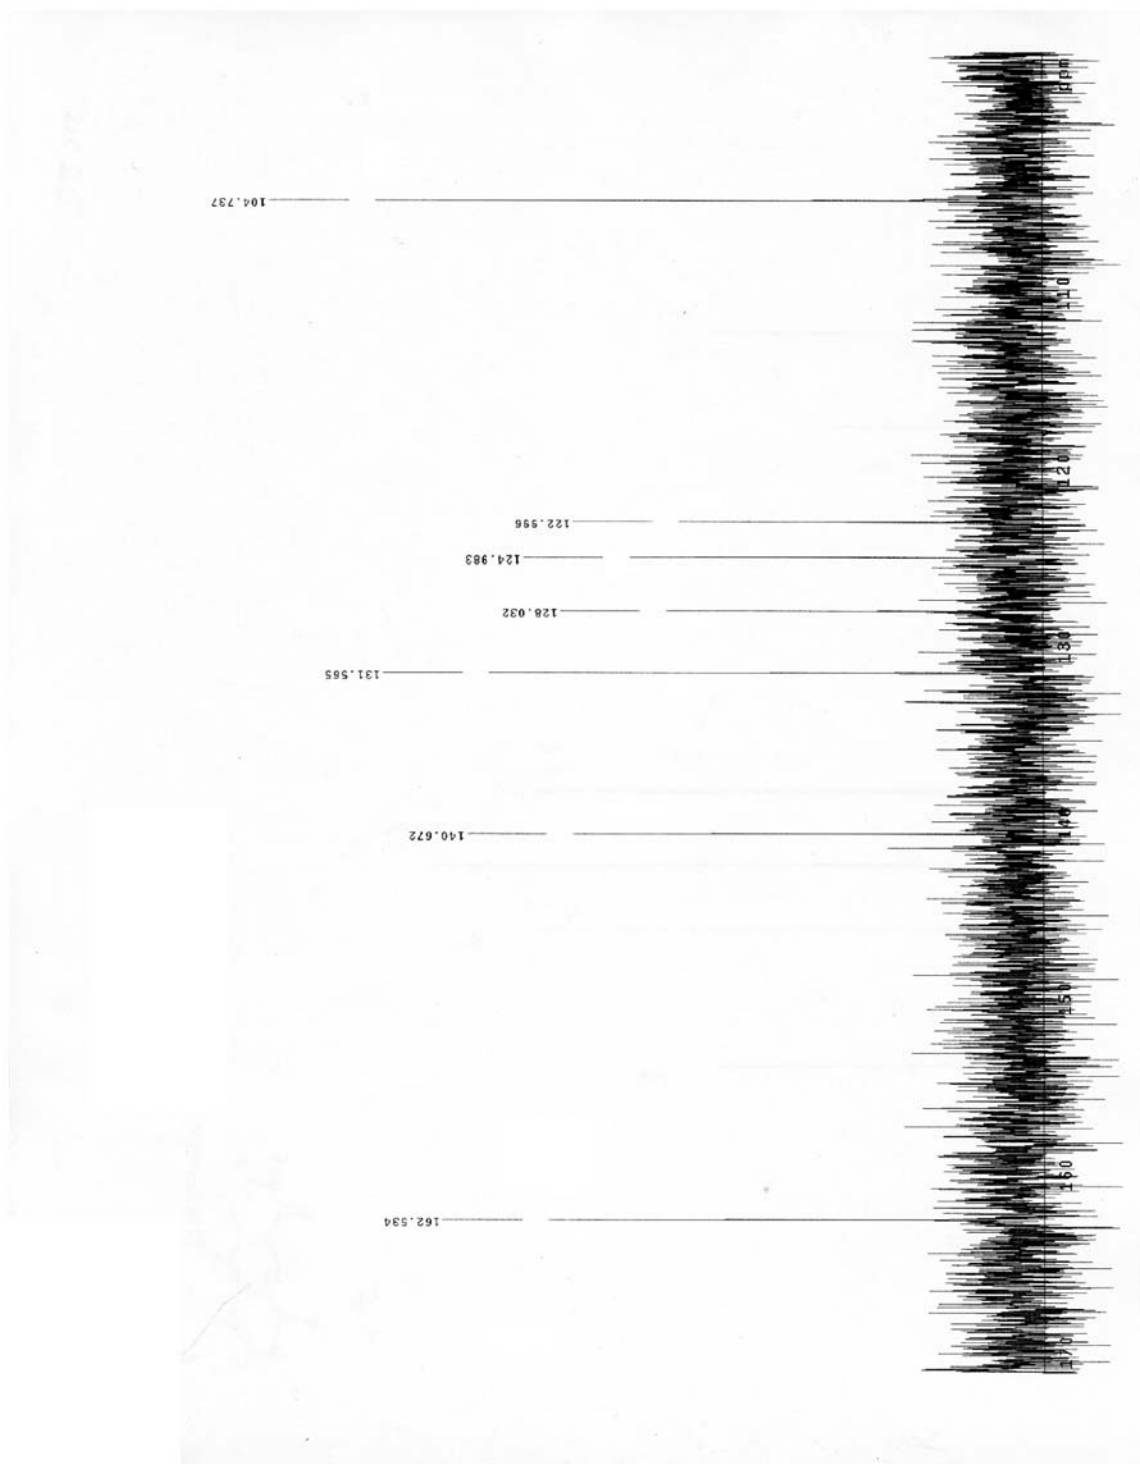

**Compound 7: 1,8-dibromo-2,7-diazaanthracene.**

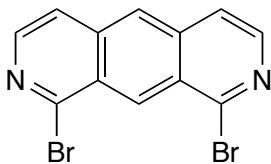

POBr<sub>3</sub> (2.42 g, 8.46 mmol), K<sub>2</sub>CO<sub>3</sub> (1.17 g, 8.46 mmol) and **6** (300 mg, 1.41 mmol) were refluxed in acetonitrile (60 ml) for 5 hours. The solvent was then evaporated and the solid suspended in ice/water. The pH of the suspension was brought to  $\approx 8$  using ammonium hydroxide. The water phase was extracted with CHCl<sub>3</sub> (3 $\times$ 50 ml). The organic phases were collected and dried over Na<sub>2</sub>SO<sub>4</sub> and the solvents evaporated. Column chromatography on SiO<sub>2</sub> (CHCl<sub>3</sub>) afforded 203 mg (0.6 mmol, 42% yield) of product **7** as a yellow powder. <sup>1</sup>H NMR (400 MHz, CDCl<sub>3</sub>):  $\delta$  = 9.47 (s, 1H), 8.37 (s, 1H), 8.31 (d,  $J$  = 6 Hz, 2H), 7.76 (d,  $J$  = 6 Hz, 2H); <sup>13</sup>C NMR (100 MHz, CDCl<sub>3</sub>):  $\delta$  = 147.8, 142.0, 136.0, 132.8, 128.2, 126.2, 120.7; ESI-MS  $m/z$  calculated for C<sub>12</sub>H<sub>7</sub>N<sub>2</sub>Br<sub>2</sub> [M+H]<sup>+</sup> 339.00, found 339.07.

Fig S.7.  $^1\text{H}$  NMR Spectrum of Compound 7

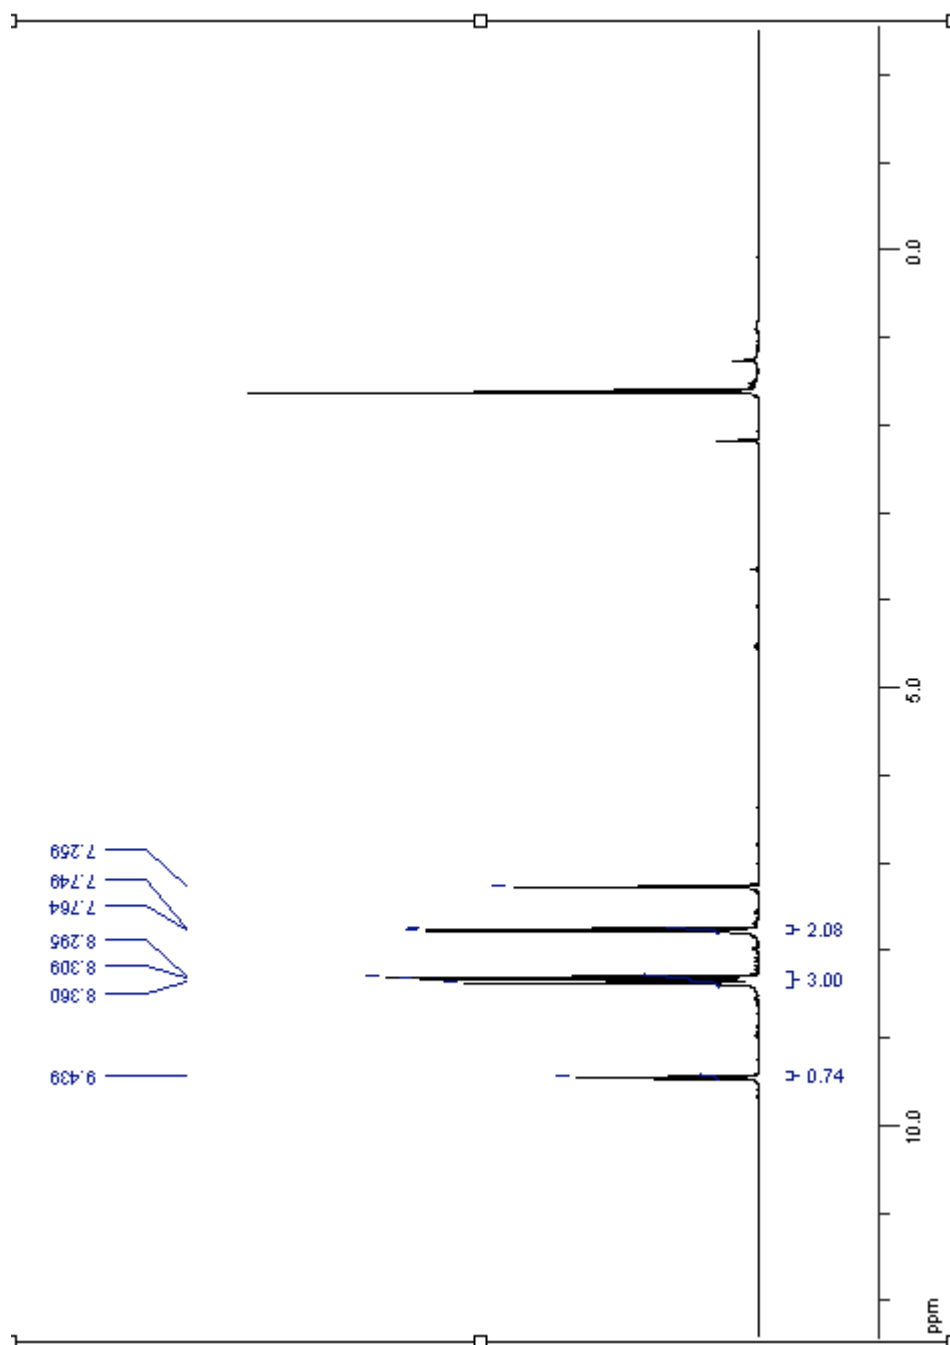

Fig S.8.  $^{13}\text{C}$  NMR Spectrum of Compound 7

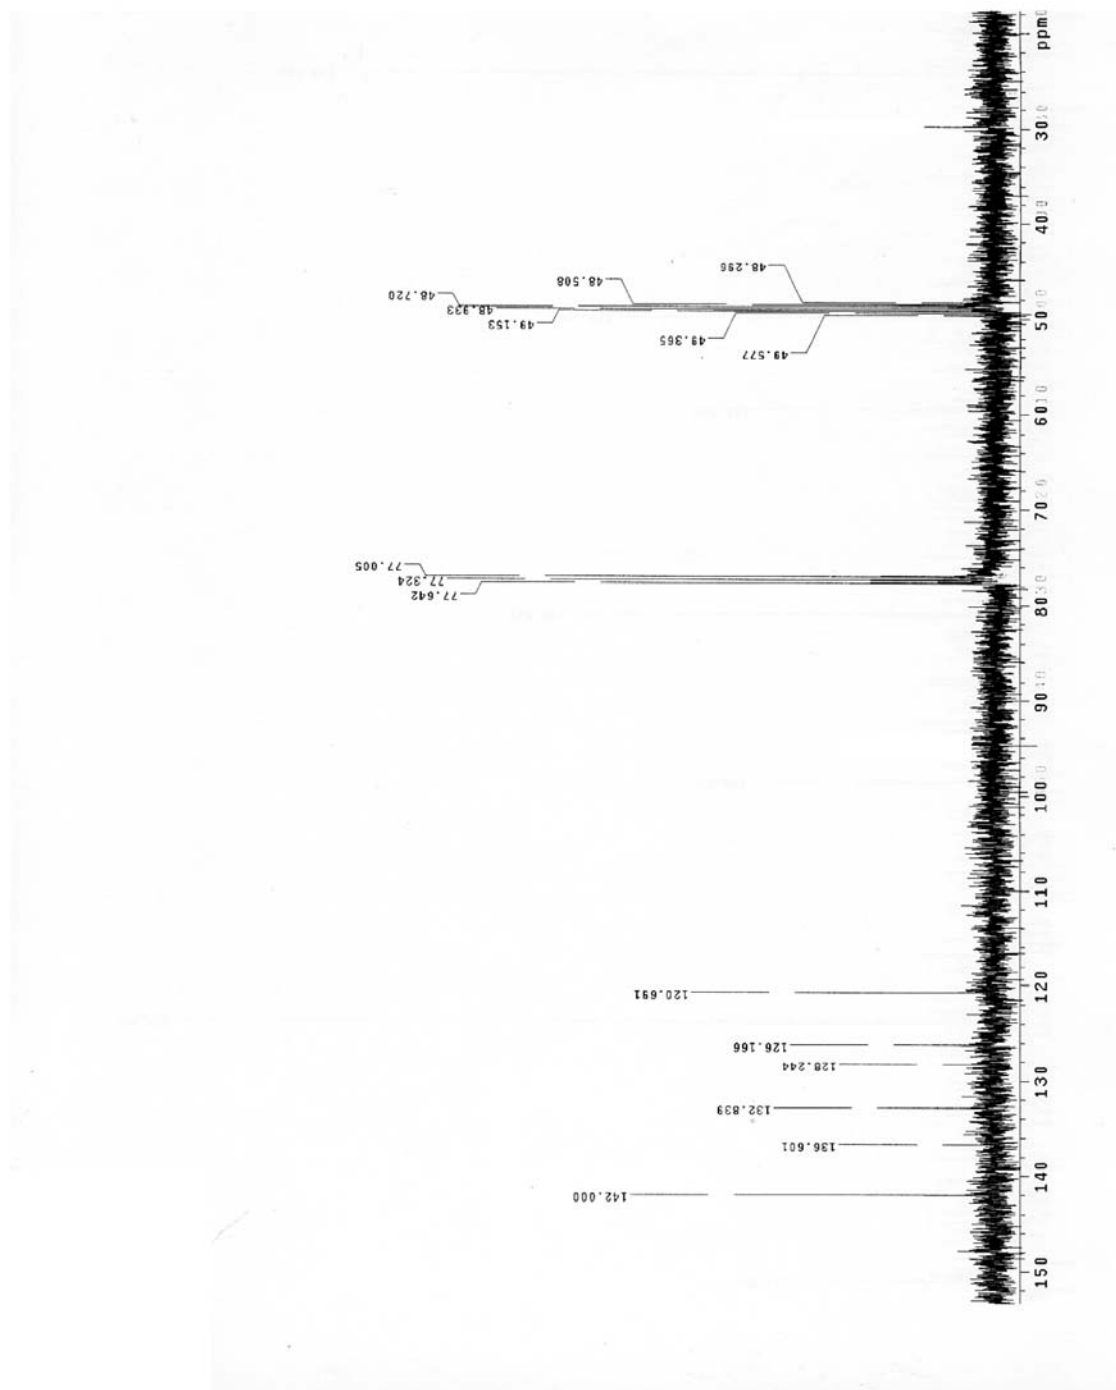

**Compound 1 : 1,8-di(pyridin-2-yl)-2,7-diazaanthracene**

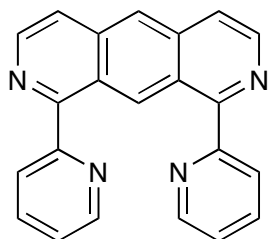

Under anhydrous conditions, *n*-BuLi (0.5 ml of a 1.6 M solution in hexanes, 0.72 mmol) was added to a solution of 2-bromopyridine (114 mg, 0.72 mmol) in dry and degassed THF (5 ml) at  $-78\text{ }^{\circ}\text{C}$ . The solution was stirred for 30 minutes at  $-78\text{ }^{\circ}\text{C}$ . To this solution was then transferred a solution of  $\text{ZnCl}_2$  (120 mg, 0.88 mmol) in THF (10 ml) and the reaction mixture was allowed to warm to room temperature. (Note: The zinc chloride was dried under vacuum at  $50\text{ }^{\circ}\text{C}$  for 2 days before use). The organozincate was then added to a solution of **7** (80 mg, 0.24 mmol) and  $\text{Pd}(\text{P}(\text{C}_6\text{H}_5)_3)_4$  (28 mg, 0.024 mmol) in dry THF (5 ml). The reaction mixture was stirred at reflux under argon overnight. Solvents were then evaporated and the solid dissolved in  $\text{CH}_2\text{Cl}_2$ . The organic phase was washed with a saturated solution of EDTA (3 $\times$ 50 ml) and then dried and evaporated. Column chromatography on  $\text{SiO}_2$  (MeOH/ $\text{CHCl}_3$  3%) afforded 64 mg (0.19 mmol, 80% yield) of product **1** as a yellow powder.  $^1\text{H}$  NMR (400 MHz,  $\text{CDCl}_3$ ):  $\delta$  = 10.44 (s, 1H), 8.74 (d,  $J$  = 4.8 Hz, 2H), 8.64 (d,  $J$  = 6 Hz, 2H), 8.45, (s, 1H), 8.13 (d,  $J$  = 7.6 Hz, 2H), 7.93 (dd,  $J$  = 8 Hz,  $J$  = 6 Hz, 2H), 7.85 (d,  $J$  = 6.4 Hz, 2H), 7.43 (dd,  $J$  = 7.6 Hz,  $J$  = 4.8 Hz, 2H);  $^{13}\text{C}$  NMR (100 MHz,  $\text{CDCl}_3$ ):  $\delta$  = 160.1, 157.9, 148.6, 141.7, 137.1, 135.7, 132.0, 125.7, 125.6, 124.1, 123.8, 120.6; ESI-MS  $m/z$  calculated for  $\text{C}_{22}\text{H}_{15}\text{N}_4$  [M+H] 335.13, found 335.32. UV ( $\text{CH}_2\text{Cl}_2$ )  $\lambda_{\text{max}}$  = 250 nm ( $\epsilon$  = 33,300),  $\lambda_{\text{max}}$  = 390 nm ( $\epsilon$  = 2,750).

**Fig S.9.  $^1\text{H}$  Spectrum of Compound 1**

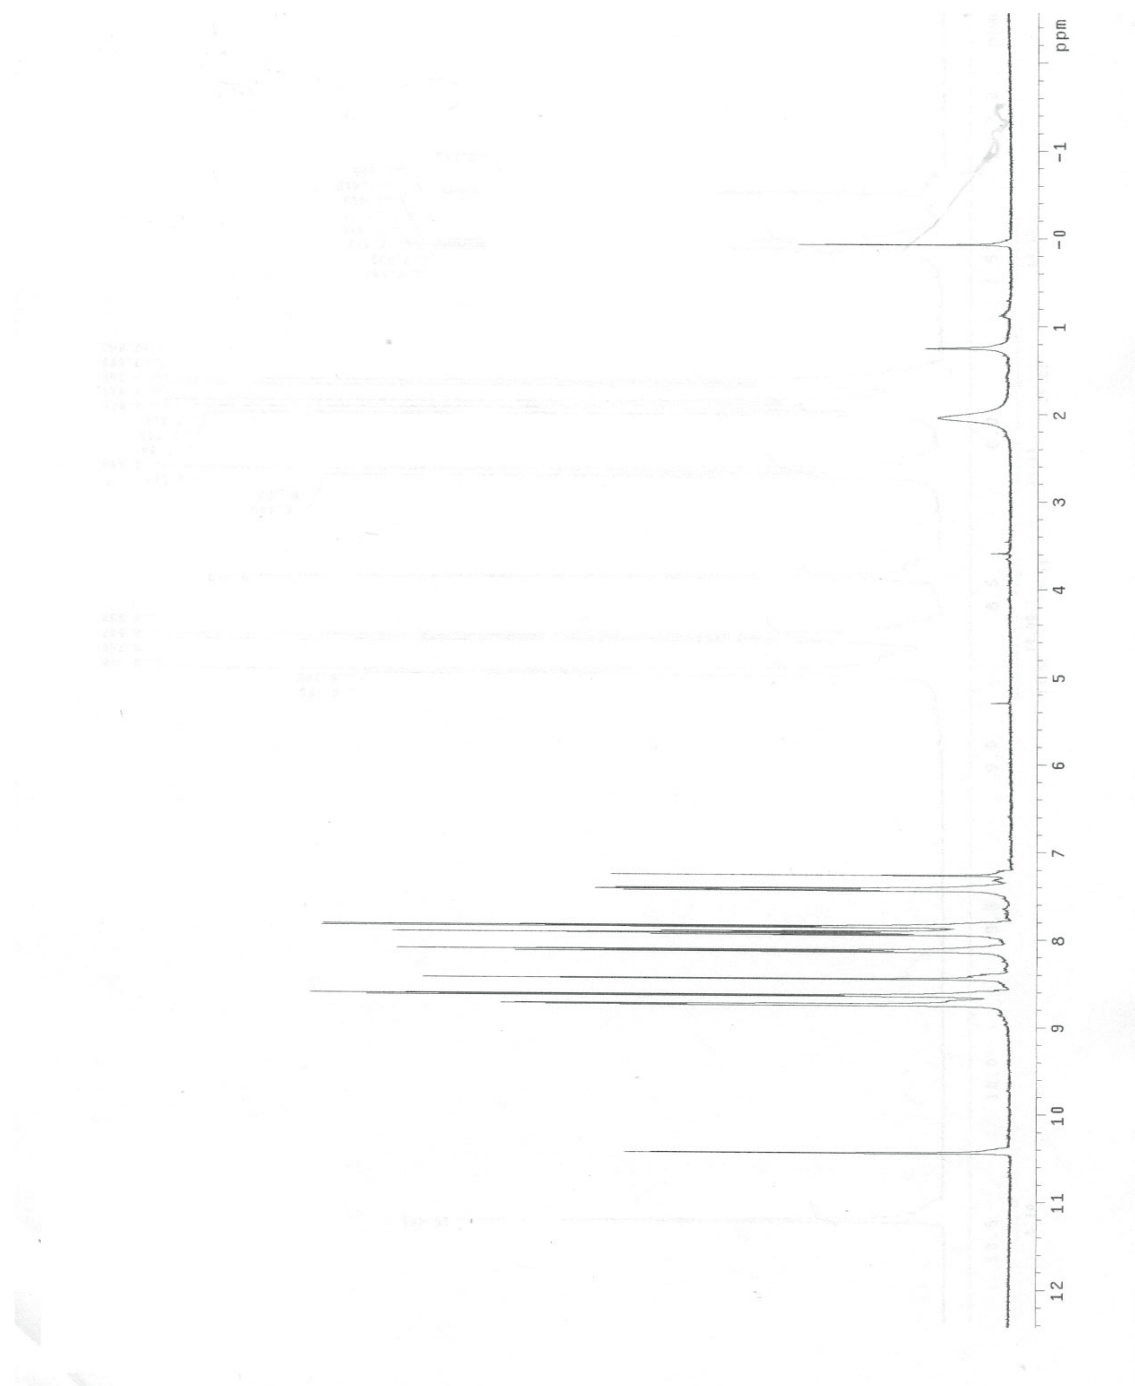



Fig S.10.  $^{13}\text{C}$  Spectrum of Compound 1

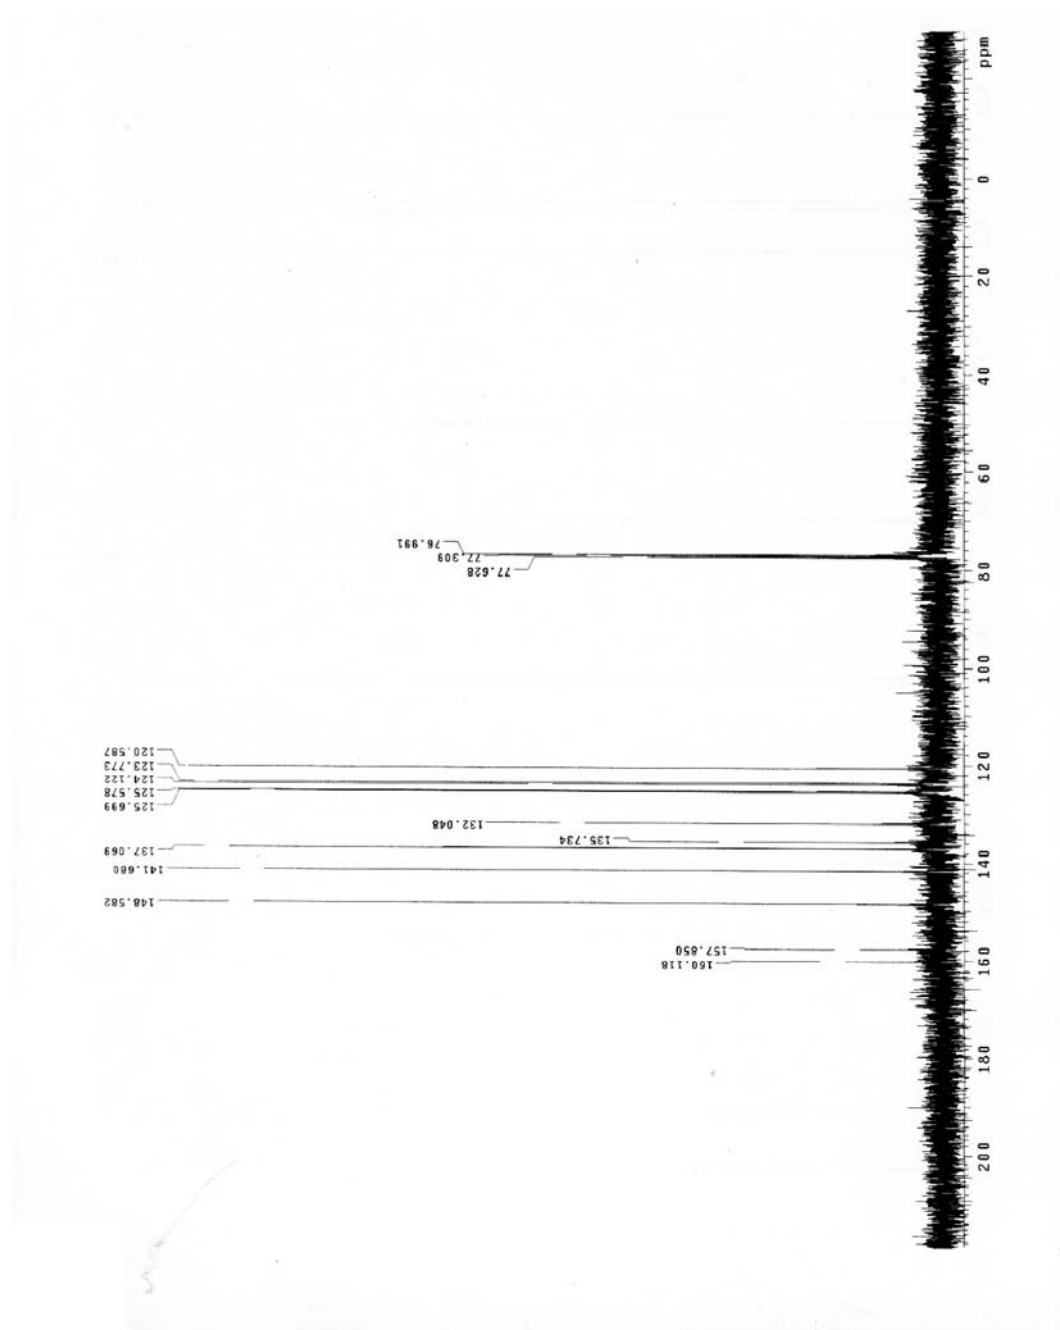

**Compound 2 : 1,8-di(pyridin-2-yl)-2,7-diazaanthracene head-to-tail dimer**

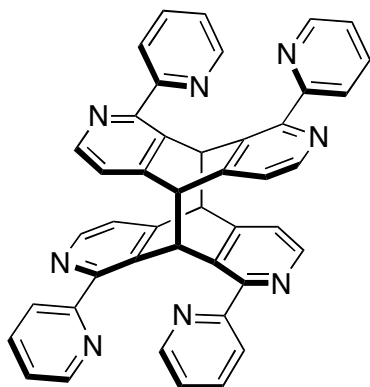

A solution of **1** in degassed acetonitrile was irradiated overnight in a quartz cell at 366 nm. The solvents were then evaporated and the compound was purified by preparative TLC eluting with CHCl<sub>3</sub>:MeOH 10%, affording **2** as a white powder. <sup>1</sup>H NMR (400 MHz, CDCl<sub>3</sub>): δ = 8.72 (d, *J* = 4.0 Hz, 4H), 8.05 (d, *J* = 4.4 Hz, 4H), 7.79 (dd, *J* = 6.4 Hz, *J* = 7.2 Hz, 4H), 7.70 (d, *J* = 8.4 Hz, 4H), 7.35 (m, 8H), 6.56 (d, *J* = 11.2 Hz, 2H), 5.29 (d, *J* = 10.8 Hz, 2H) ESI-MS *m/z* calculated for C<sub>44</sub>H<sub>29</sub>N<sub>8</sub> [M+H] 669.25, found 669.11. See spectrum in manuscript.

### Quantum Yield Determination.

Quantum yields were determined using coumarin 30 as a standard (Du, H.; Fuh, R. A.; Li, J.; Corkan, A.; Lindsey, J. S. *Photochem. and Photobiol.*, **1998**, 68, 141–142) for ligand **1**. Quantum yields were determined using the following equation:

$$\Phi_{F(x)} = (A_s/A_x) (F_x/F_s) (n_x/n_s)^2 \Phi_{F(s)}$$

where s is the standard, x is the unknown, A is the absorbance at excitation wavelength, F is the area under the emission curve, *n* is the refractive index of the solvent and  $\Phi$  is the quantum yield (Lavabre, D.; Fery-Forgues, S. *J. Chem. Educ.*, **1999**, 76, 1260–1264).

The fluorescence quantum yield for compound **1** has been determined to 0.02 in dichloromethane at 25 °C.

**Fig S.11. Absorption spectrum of ligand 2 in dichloromethane.**

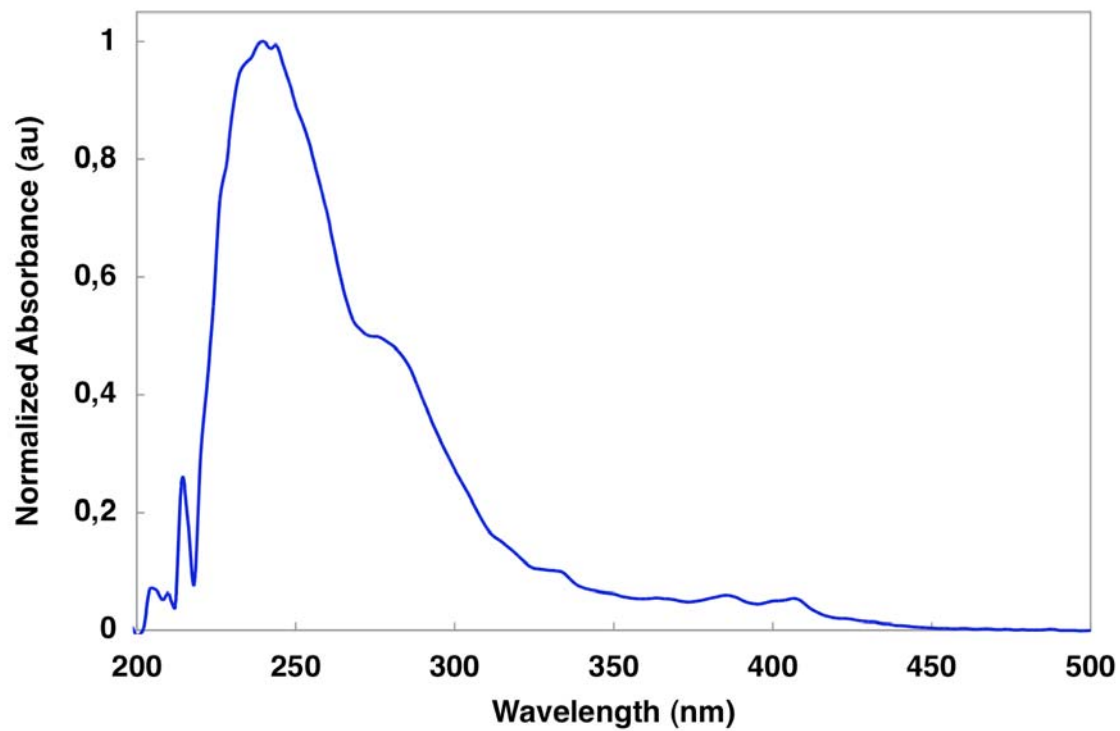

**Fig S.12. Fluorescence monitoring of the reversible dimerization.**

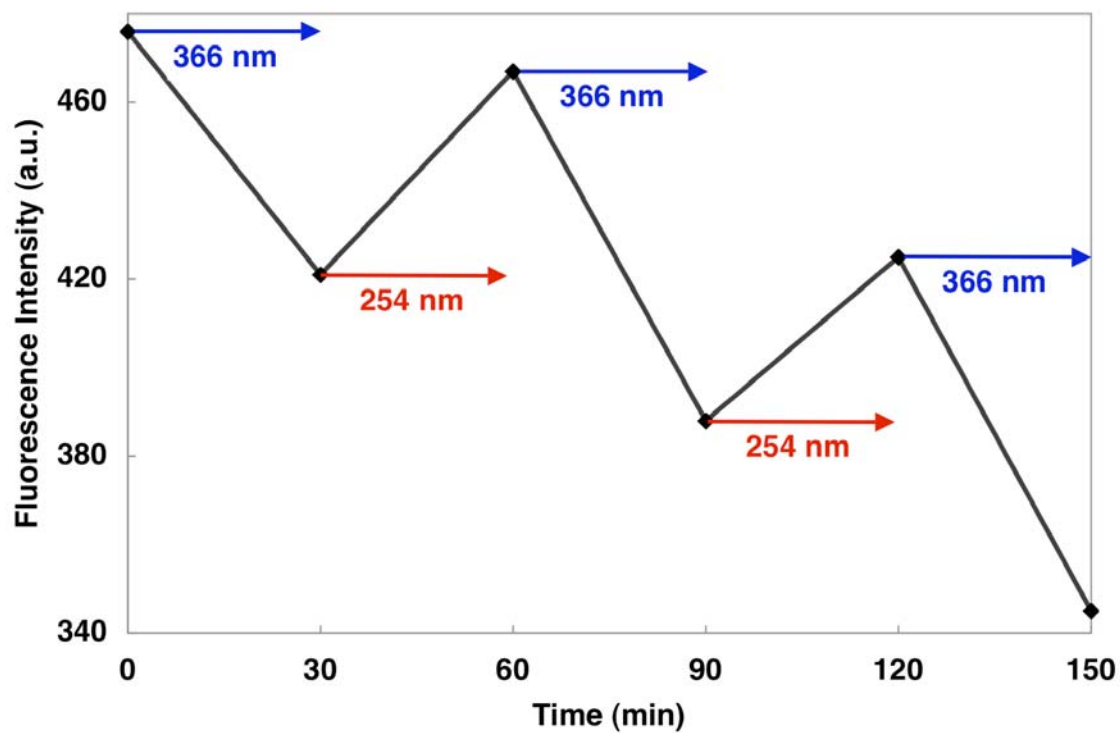

Compound **1** was irradiated for 30 minutes at 366 nm and then 30 minutes at 254 nm in a degassed solution of acetonitrile for several cycles.

Fig S.13. Mass spectrum of the dimer 2

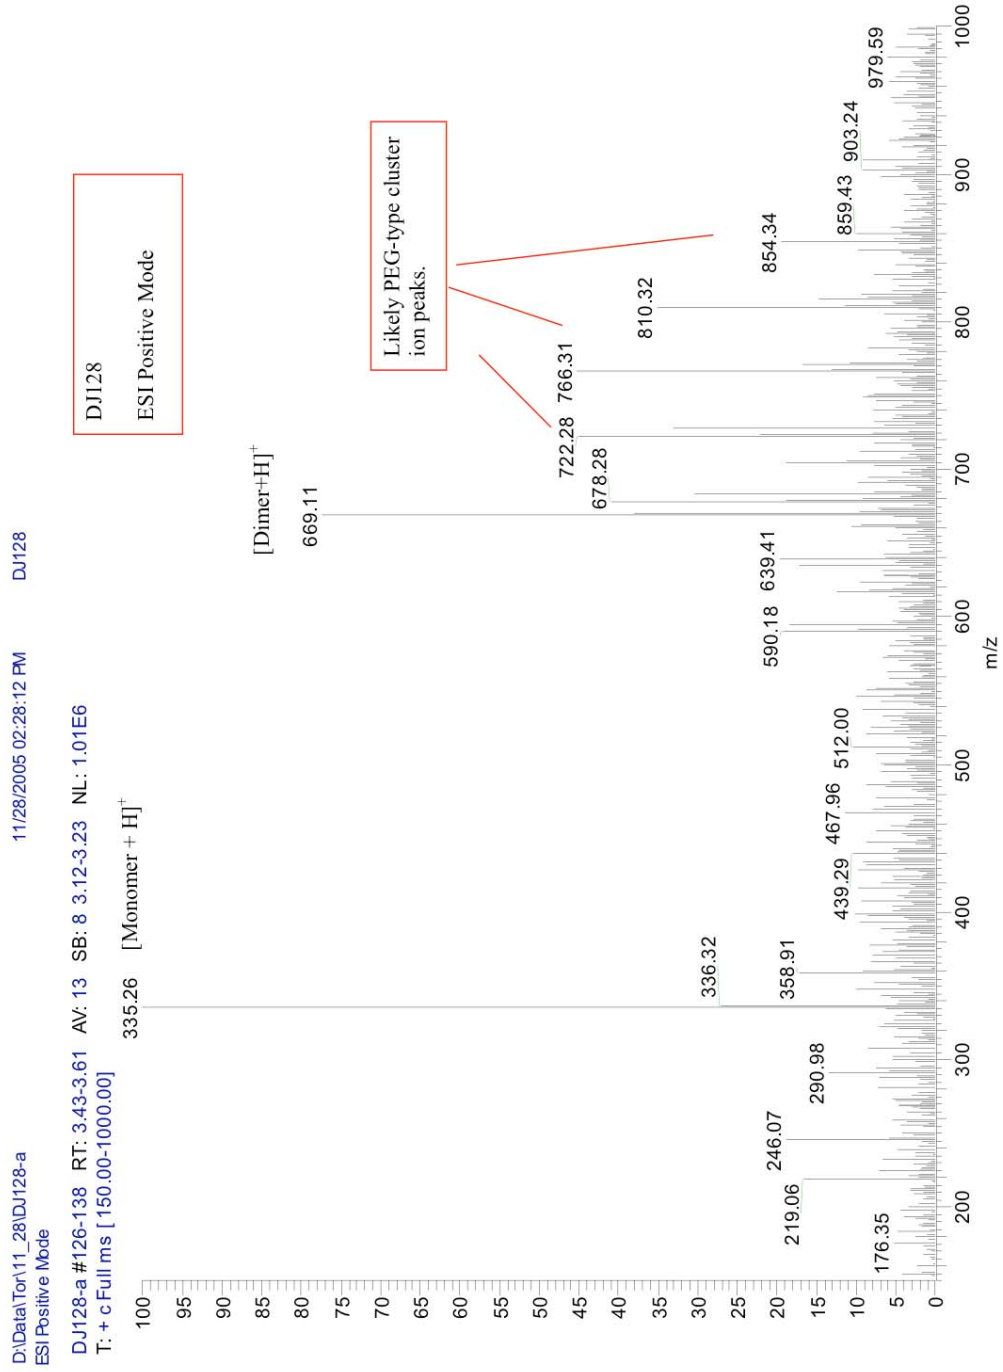

## Crystal data and structure refinement for 1.

|                                   |                                                |          |
|-----------------------------------|------------------------------------------------|----------|
| Empirical formula                 | C <sub>22</sub> H <sub>14</sub> N <sub>4</sub> |          |
| Formula weight                    | 334.37                                         |          |
| Temperature                       | 218(2) K                                       |          |
| Wavelength                        | 0.71073 Å                                      |          |
| Crystal system                    | Orthorhombic                                   |          |
| Space group                       | Pna2(1)                                        |          |
| Unit cell dimensions              | a = 23.964(9) Å                                | α = 90°. |
|                                   | b = 6.054(2) Å                                 | β = 90°. |
|                                   | c = 11.160(4) Å                                | γ = 90°. |
| Volume                            | 1619.0(11) Å <sup>3</sup>                      |          |
| Z                                 | 4                                              |          |
| Density (calculated)              | 1.372 Mg/m <sup>3</sup>                        |          |
| Absorption coefficient            | 0.084 mm <sup>-1</sup>                         |          |
| F(000)                            | 696                                            |          |
| Crystal size                      | 0.40 x 0.15 x 0.15 mm <sup>3</sup>             |          |
| Theta range for data collection   | 1.70 to 28.30°.                                |          |
| Index ranges                      | -28 ≤ h ≤ 31, -7 ≤ k ≤ 8, -14 ≤ l ≤ 14         |          |
| Reflections collected             | 11582                                          |          |
| Independent reflections           | 2019 [R(int) = 0.0434]                         |          |
| Completeness to theta = 28.30°    | 95.9 %                                         |          |
| Absorption correction             | Semi-empirical from equivalents                |          |
| Max. and min. transmission        | 0.9875 and 0.9551                              |          |
| Refinement method                 | Full-matrix least-squares on F <sup>2</sup>    |          |
| Data / restraints / parameters    | 2019 / 1 / 235                                 |          |
| Goodness-of-fit on F <sup>2</sup> | 1.052                                          |          |
| Final R indices [I > 2σ(I)]       | R1 = 0.0383, wR2 = 0.0940                      |          |
| R indices (all data)              | R1 = 0.0425, wR2 = 0.0966                      |          |
| Absolute structure parameter      | 0(10)                                          |          |
| Largest diff. peak and hole       | 0.211 and -0.201 e.Å <sup>-3</sup>             |          |

## Crystal data and structure refinement for 2.

|                                   |                                                |                 |
|-----------------------------------|------------------------------------------------|-----------------|
| Empirical formula                 | C <sub>44</sub> H <sub>28</sub> N <sub>8</sub> |                 |
| Formula weight                    | 668.74                                         |                 |
| Temperature                       | 208(2) K                                       |                 |
| Wavelength                        | 0.71073 Å                                      |                 |
| Crystal system                    | Monoclinic                                     |                 |
| Space group                       | P2(1)/c                                        |                 |
| Unit cell dimensions              | a = 8.3433(9) Å                                | a = 90°.        |
|                                   | b = 12.0224(13) Å                              | b = 98.373(2)°. |
|                                   | c = 15.8306(18) Å                              | g = 90°.        |
| Volume                            | 1571.0(3) Å <sup>3</sup>                       |                 |
| Z                                 | 2                                              |                 |
| Density (calculated)              | 1.414 Mg/m <sup>3</sup>                        |                 |
| Absorption coefficient            | 0.087 mm <sup>-1</sup>                         |                 |
| F(000)                            | 696                                            |                 |
| Crystal size                      | 0.40 x 0.35 x 0.30 mm <sup>3</sup>             |                 |
| Theta range for data collection   | 2.14 to 28.26°.                                |                 |
| Index ranges                      | -11<=h<=10, -15<=k<=15, -19<=l<=20             |                 |
| Reflections collected             | 11563                                          |                 |
| Independent reflections           | 3674 [R(int) = 0.0392]                         |                 |
| Completeness to theta = 28.26°    | 94.5 %                                         |                 |
| Absorption correction             | Semi-empirical from equivalents                |                 |
| Max. and min. transmission        | 0.9745 and 0.9416                              |                 |
| Refinement method                 | Full-matrix least-squares on F <sup>2</sup>    |                 |
| Data / restraints / parameters    | 3674 / 0 / 235                                 |                 |
| Goodness-of-fit on F <sup>2</sup> | 1.034                                          |                 |
| Final R indices [I>2sigma(I)]     | R1 = 0.0547, wR2 = 0.1452                      |                 |
| R indices (all data)              | R1 = 0.0766, wR2 = 0.1607                      |                 |
| Largest diff. peak and hole       | 0.324 and -0.185 e.Å <sup>-3</sup>             |                 |



Fig S.14. UV-Vis spectra of a mono and dinuclear Ru(II) complexes of Ligand 1 in CH<sub>3</sub>CN

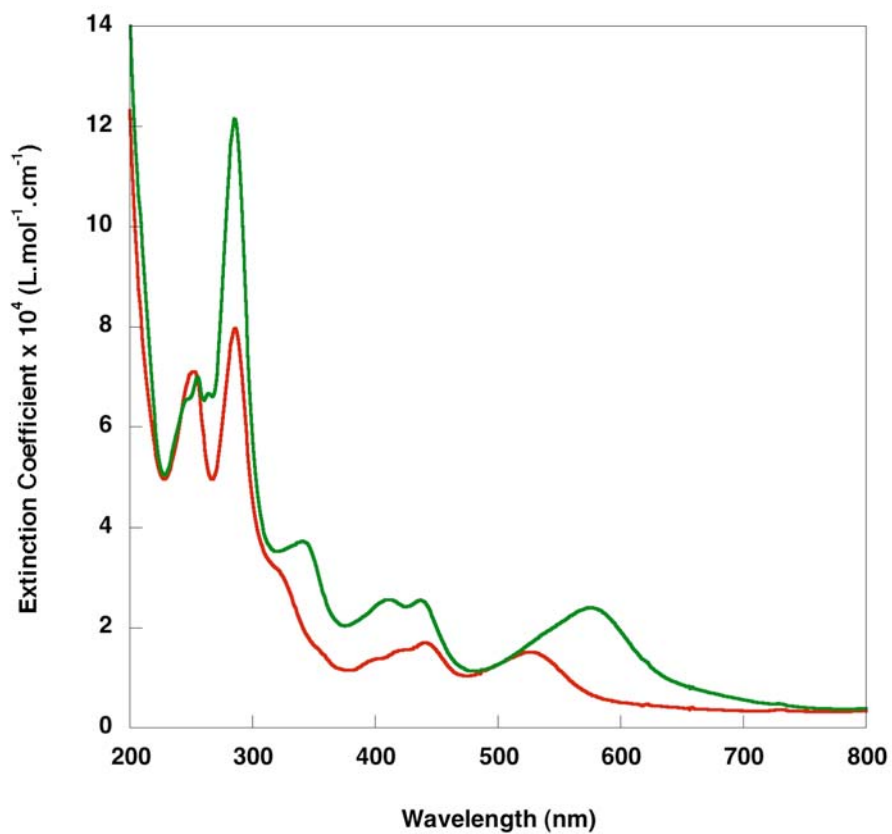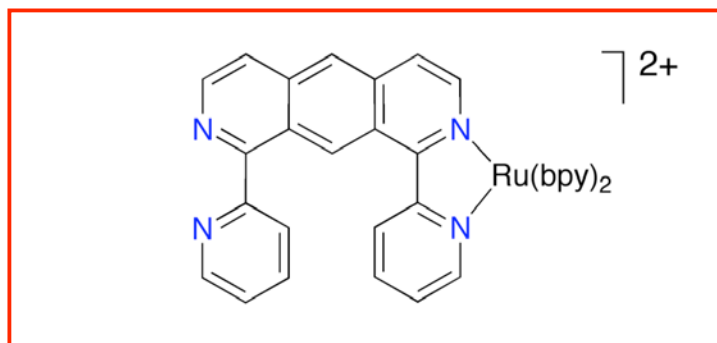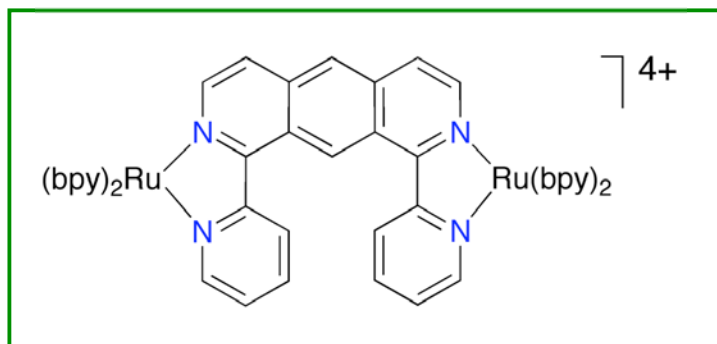

**Fig S.15. Reaction of ligands 1 and 2 with  $\text{Fe}^{2+}$  shows distinct colors**

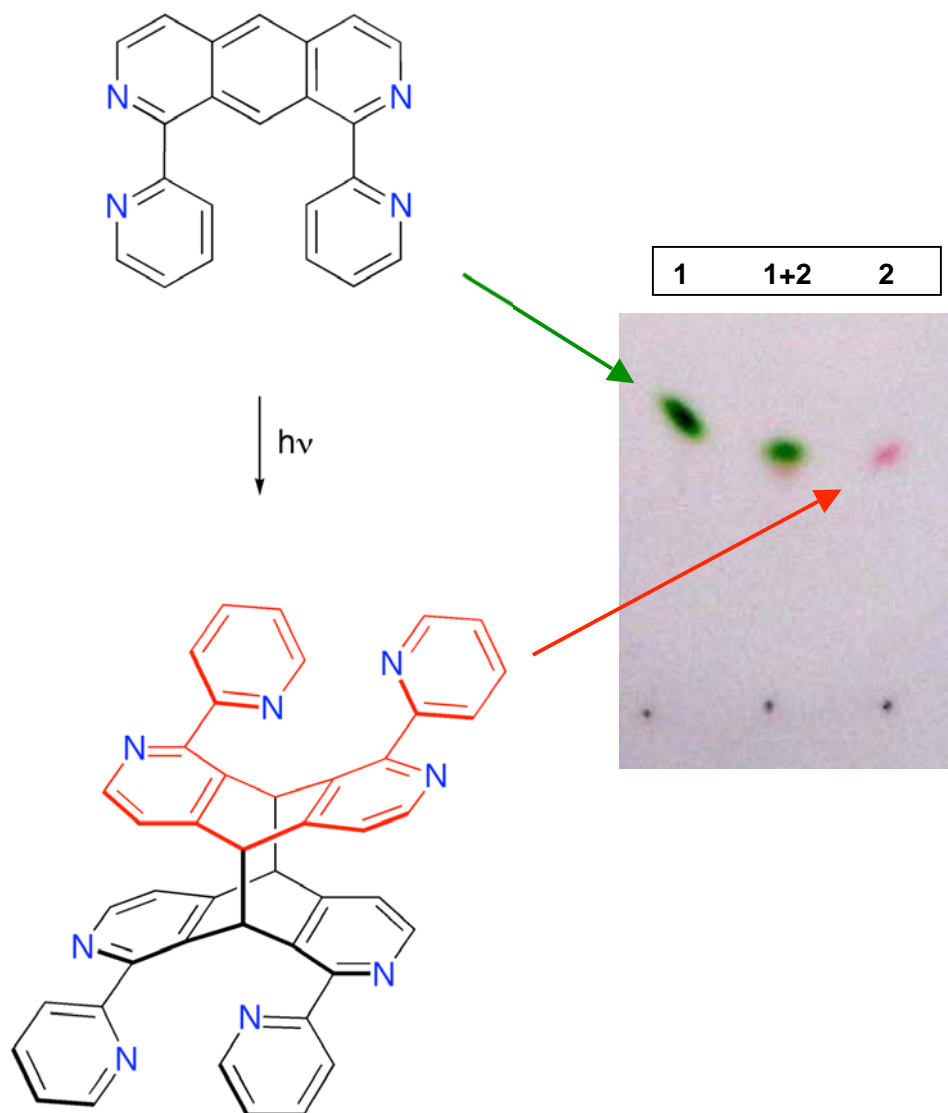

$\text{Fe}^{2+}$ -stained TLC plate shows the separation of ligand **1** and **2** and their distinct reaction with a  $\text{Fe}^{2+}$ , a common visualizing reagent for bpy-type ligands. Note the **red color** displayed by  $\mathbf{2}\cdot\text{Fe}^{2+}$  is very similar to the color generated by the parent 2,2'-bipyridine (demonstrating the electronic disconnection between the bpy unit in the photo-dimer), while the **green color** generated by  $\mathbf{1}\cdot\text{Fe}^{2+}$ , reflects long-wavelength absorption bands that are a results of the extended conjugation in the precursor monomeric dinuclear ligand **1**.
